# Supplementary material for: Gut Bifidobacteria enrichment following oral Lactobacillus-supplementation is associated with clinical improvements in children with cystic fibrosis
Source: PubMed Central journal article supplement (PMC9330662; doi:10.1186/s12890-022-02078-9), 2022-07-28

**Supplemental Figure 1.** Alpha Diversity by treatment group over a 12 month period.

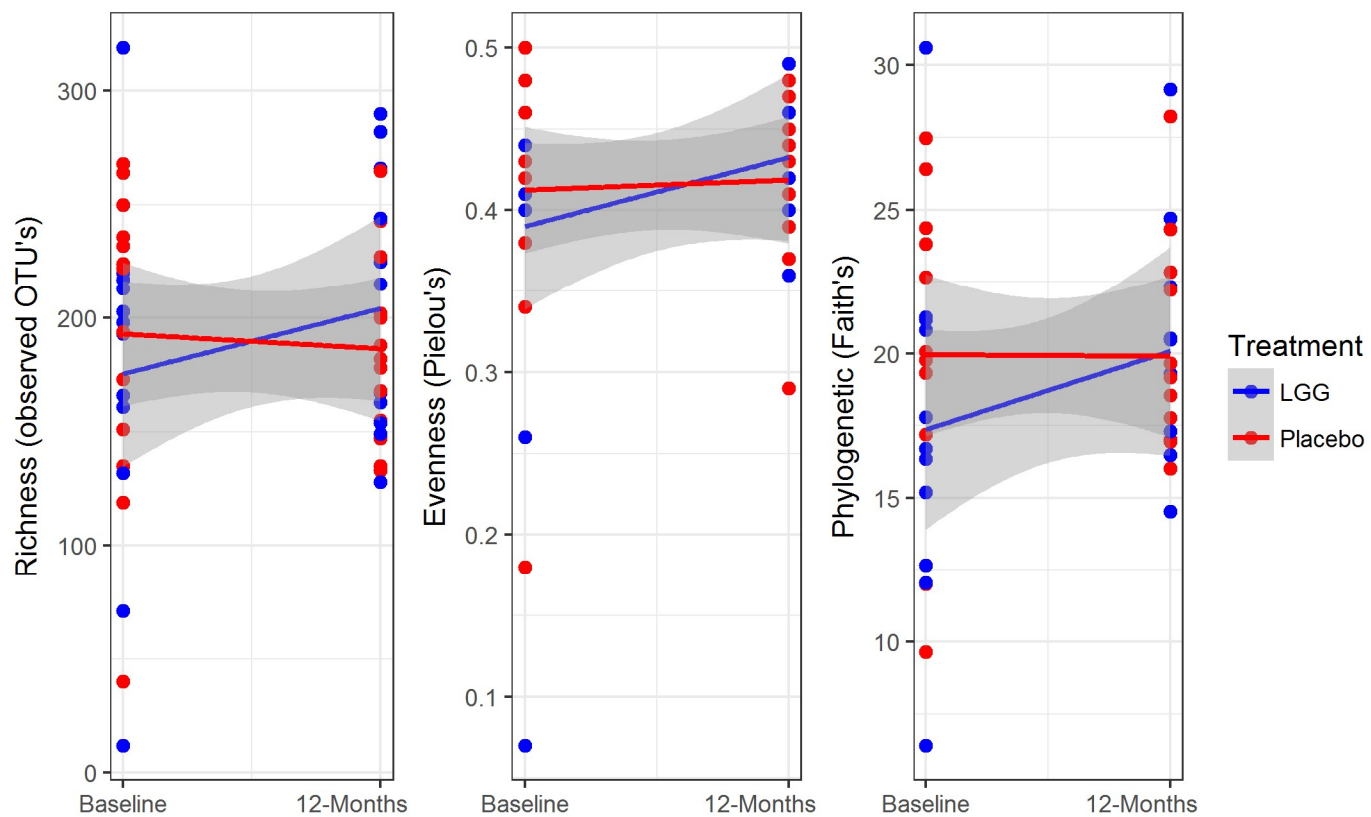

Supplement: 12890_2022_2078_MOESM2_ESM.pdf [file 12890_2022_2078_MOESM2_ESM.pdf]
