# Supplementary material for: Gut Bifidobacteria enrichment following oral Lactobacillus-supplementation is associated with clinical improvements in children with cystic fibrosis
Source: PubMed Central journal article supplement (PMC9330662; doi:10.1186/s12890-022-02078-9), 2022-07-28
Supplement: 12890_2022_2078_MOESM4_ESM.pdf [file 12890_2022_2078_MOESM4_ESM.pdf]

2b. Taxonomic level = Family

| Key |     |
|-----|-----|
| LGG | PLC |

|                                                           | Taxonomy at Baseline (Family level) |                   |                           |                           |                           |                          |                        |                        |                  |                       |           |                         |                         |                       |                           |                       | LGG  | PLC  | P |                           |      |   |   |
|-----------------------------------------------------------|-------------------------------------|-------------------|---------------------------|---------------------------|---------------------------|--------------------------|------------------------|------------------------|------------------|-----------------------|-----------|-------------------------|-------------------------|-----------------------|---------------------------|-----------------------|------|------|---|---------------------------|------|---|---|
|                                                           | Phylum                              | Class             | Order                     | Family                    | <i>Bifidobacteriaceae</i> | <i>Coriobacteriaceae</i> | <i>Ruminococcaceae</i> | <i>Veillonellaceae</i> | Undefined Family | <i>Clostridiaceae</i> | undefined | <i>Streptococcaceae</i> | <i>Lactobacillaceae</i> | <i>Bacteroidaceae</i> | <i>Porphyromonadaceae</i> | <i>Prevotallaceae</i> |      |      |   | <i>Enterobacteriaceae</i> |      |   |   |
| Taxonomy after 12-months of Treatment                     | Actinobacteria                      | Actinobacteria    | <i>Bifidobacteriales</i>  | <i>Bifidobacteriaceae</i> | S103;<br>S108             |                          |                        | S148                   |                  | S121                  |           |                         |                         | S133                  |                           |                       |      | 4    | 1 | 0.11                      |      |   |   |
|                                                           |                                     |                   | <i>Coriobacteriales</i>   | <i>Coriobacteriaceae</i>  |                           |                          |                        |                        |                  |                       |           |                         |                         |                       | S100                      |                       | S151 |      | 1 |                           | 1    |   |   |
|                                                           | Firmicutes                          | Clostridia        | Clostridiales             | <i>Ruminococcaceae</i>    |                           |                          |                        |                        |                  |                       |           |                         |                         |                       | S126                      |                       |      | S119 | 2 |                           | 0    |   |   |
|                                                           |                                     |                   |                           | <i>Veillonellaceae</i>    |                           |                          | S129                   |                        |                  |                       |           |                         |                         |                       |                           |                       |      |      |   |                           | 1    | 0 |   |
|                                                           |                                     |                   |                           | <i>Lachnospiraceae</i>    |                           |                          |                        | S115                   |                  |                       |           |                         |                         |                       |                           |                       |      |      |   |                           | S122 | 1 | 1 |
|                                                           |                                     |                   |                           | <i>Clostridiaceae</i>     |                           |                          |                        |                        |                  |                       |           |                         |                         |                       |                           |                       |      |      |   |                           |      | 0 | 0 |
|                                                           |                                     |                   |                           | Undefined Family          |                           |                          |                        |                        |                  |                       |           | S104                    |                         |                       |                           |                       |      |      |   |                           |      | 1 | 0 |
|                                                           |                                     | Bacilla           | Lactobacillales           | <i>Streptococcaceae</i>   |                           |                          |                        |                        |                  |                       |           |                         |                         |                       |                           |                       |      |      |   |                           | S111 | 0 | 1 |
|                                                           | <i>Lactobacillaceae</i>             |                   |                           |                           |                           |                          |                        |                        |                  |                       |           |                         |                         |                       |                           |                       |      |      |   |                           | 0    | 0 |   |
|                                                           | Bacteroidetes                       | Bacteroidia       | Bacteroidales             | <i>Bacteroidaceae</i>     |                           | S149                     |                        |                        |                  |                       |           |                         |                         |                       | S110                      | S117;<br>S140         |      |      |   |                           | 0    | 4 |   |
| <i>Prevotallaceae</i>                                     |                                     |                   |                           |                           |                           |                          |                        |                        | S134             |                       |           |                         |                         |                       |                           |                       |      |      |   | 0                         | 1    |   |   |
| Proteobacteria                                            | Gamma-proteobacteria                | Enterobacteriales | <i>Enterobacteriaceae</i> |                           | S112                      |                          |                        |                        |                  |                       |           |                         |                         | S156;<br>S154         | S152                      |                       |      |      | 1 | 3                         |      |   |   |
| Total number of subjects with longitudinal paired samples |                                     |                   |                           |                           |                           |                          |                        |                        |                  |                       |           |                         |                         |                       |                           |                       | 11   | 12   |   |                           |      |   |   |

## 2c. Taxonomic level = Order

| Key |     |
|-----|-----|
| LGG | PLC |

|                                                           |                             | Taxonomy at Baseline (Order level) |                          |                      |                        |                      |                          |     |     |   |      |
|-----------------------------------------------------------|-----------------------------|------------------------------------|--------------------------|----------------------|------------------------|----------------------|--------------------------|-----|-----|---|------|
| Phylum                                                    | Class                       | Order                              | <i>Bifidobacteriales</i> | <i>Clostridiales</i> | <i>Lactobacillales</i> | <i>Bacteroidales</i> | <i>Enterobacteriales</i> | LGG | PLC | P |      |
| Actinobacteria                                            | Actinobacteria              | <i>Bifidobacteriales</i>           | S103; S108               | S148                 | S121                   |                      | S133                     |     | 4   | 1 | 0.02 |
|                                                           |                             | <i>Coriobacteriales</i>            |                          |                      |                        | S100                 | S151                     |     | 1   | 1 |      |
| Firmicutes                                                | <i>Clostridia</i>           | <i>Clostridiales</i>               | S115                     | S129; S104           |                        | S126                 | S119; S122               | 5   | 1   |   |      |
|                                                           | <i>Bacilla</i>              | <i>Lactobacillales</i>             |                          |                      |                        |                      | S111                     | 0   | 1   |   |      |
| Bacteroidetes                                             | <i>Bacteroidia</i>          | <i>Bacteroidales</i>               | S149                     | S134                 | S110                   | S117; S140           |                          | 0   | 5   |   |      |
| Proteobacteria                                            | <i>Gamma-proteobacteria</i> | <i>Enterobacteriales</i>           | S112                     |                      |                        | S156; S154           | S152                     | 1   | 3   |   |      |
| Total number of subjects with longitudinal paired samples |                             |                                    |                          |                      |                        |                      |                          | 11  | 12  |   |      |

## 2 d. Taxonomic level = Class

| Key |     |
|-----|-----|
| LGG | PLC |

|                                                           |                             | Taxonomy at Baseline (Class level) |                   |                |                    |                             |      |     |   |       |
|-----------------------------------------------------------|-----------------------------|------------------------------------|-------------------|----------------|--------------------|-----------------------------|------|-----|---|-------|
| Phylum                                                    | Class                       | <i>Actinobacteria</i>              | <i>Clostridia</i> | <i>Bacilla</i> | <i>Bacteroidia</i> | <i>Gamma-proteobacteria</i> | LGG  | PLC | P |       |
| Actinobacteria                                            | <i>Actinobacteria</i>       | S103; S108                         | S148              | S121           |                    | S133; S100                  | S151 | 5   | 2 | 0.016 |
| Firmicutes                                                | <i>Clostridia</i>           | S115                               | S129; S104        |                | S126               | S119; S122                  | 5    | 1   |   |       |
|                                                           | <i>Bacilla</i>              |                                    |                   |                |                    | S111                        | 0    | 1   |   |       |
| Bacteroidetes                                             | <i>Bacteroidia</i>          | S149                               | S134              | S110           | S117; S140         |                             | 0    | 5   |   |       |
| Proteobacteria                                            | <i>Gamma-proteobacteria</i> | S112                               |                   |                | S156; S154         | S152                        | 1    | 3   |   |       |
| Total number of subjects with longitudinal paired samples |                             |                                    |                   |                |                    |                             | 11   | 12  |   |       |

2e. Taxonomic level = Phylum

| Key |     |
|-----|-----|
| LGG | PLC |

|                                                           |                       | Taxonomy at Baseline (Phylum level) |                   |      |                      |      |                       |      |     |     |          |
|-----------------------------------------------------------|-----------------------|-------------------------------------|-------------------|------|----------------------|------|-----------------------|------|-----|-----|----------|
|                                                           |                       | <i>Actinobacteria</i>               | <i>Firmicutes</i> |      | <i>Bacteroidetes</i> |      | <i>Proteobacteria</i> |      | LGG | PLC | <i>P</i> |
| Phylum                                                    |                       |                                     |                   |      |                      |      |                       |      |     |     |          |
| Taxonomy after<br>12-months of<br>Treatment               | <i>Actinobacteria</i> | S103;<br>S108                       | S148              | S121 | S133;<br>S100        |      |                       | S151 | 5   | 2   | 0.03     |
|                                                           | <i>Firmicutes</i>     | S115                                | S129; S104        |      | S126                 |      | S119;<br>S122         | S111 | 5   | 2   |          |
|                                                           | <i>Bacteroidetes</i>  | S149                                | S134;<br>S110     |      | S117;<br>S140        |      |                       |      | 0   | 5   |          |
|                                                           | <i>Proteobacteria</i> | S112                                |                   |      | S156;<br>S154        | S152 |                       |      | 1   | 3   |          |
| Total number of subjects with longitudinal paired samples |                       |                                     |                   |      |                      |      |                       |      | 11  | 12  |          |

**Supplemental Figure 2a-e.** Shift table showing composition of gut microbiota of patients (n=23) having paired samples at baseline (displayed horizontally) and 12-month visit (displayed vertically) are shown at each taxonomic level. Red shading represents patients treated with LGG probiotics (N=11), blue shading represents patient's treated with placebo (N=12). Patients with undefined taxonomy at either visit were excluded from the analysis.

In the 23 patients (that had samples sequenced at baseline and 12-months), there was a statistically significant difference between the distribution of dominant taxa by treatment arms found in the microbiome after 12 months of treatment at the genera ( $P=0.005$ ), order ( $P=0.02$ ), class ( $P=0.016$ ), and phylum ( $P=0.03$ ) levels, but not at the family level ( $P=0.11$ ). All ranks were tested to account for any questions about undefined taxonomic levels within samples. No difference in the distribution of dominant genus was evident at baseline prior to treatment indicating the randomization held for this subset of patients that had fecal samples at 12-months at the genera ( $P=1$ ), family ( $P=1$ ), order ( $P=1$ ), class ( $P=1$ ), and phylum ( $P=0.7$ )
